# Supplementary material for: Persistent Moderate-to-Weak Mediterranean Diet Adherence and Low Scoring for Plant-Based Foods across Several Southern European Countries: Are We Overlooking the Mediterranean Diet Recommendations?
Source: MDPI journal article supplement (doi:10.3390/nu13051432), 2021-04-23
Supplement: s1 [file s1]

**Supplementary Table S6.** Food choice differences across reported disease status in the sample population from the MED and the non-MED group of countries: % of participants scoring 1 (within Mediterranean diet recommendations) for each question of the 14-MEDAS. MED: all Mediterranean countries together (SP, PT, IT, GR, CY); Non-MED: all non-Mediterranean countries together (BG and NMK).

| 14-MEDAS Question (Score 1)                | MED          |               |                 |                              |                          | Non-MED      |               |                 |                              |                          |
|--------------------------------------------|--------------|---------------|-----------------|------------------------------|--------------------------|--------------|---------------|-----------------|------------------------------|--------------------------|
|                                            | No pathology | One pathology | Multi-pathology | <i>p</i> -value <sup>1</sup> | Effect size <sup>2</sup> | No pathology | One pathology | Multi-pathology | <i>p</i> -value <sup>1</sup> | Effect size <sup>2</sup> |
| 1. Olive oil as main culinary fat (yes)    | 94.1         | 96.3          | 96.0            | NS                           | -                        | 37.9         | 45.6          | 22.2            | NS                           | -                        |
| 2. Olive oil (≥4 tbsp <sup>3</sup> /day)   | 17.8         | 15.7          | 23.0            | NS                           | -                        | 6.6          | 6.7           | 5.6             | NS                           | -                        |
| 3. Vegetables (≥2 portions/day)            | 50.7         | 52.8          | 59.0            | NS                           | -                        | 33.0         | 32.2          | 58.8            | NS                           | -                        |
| 4. Fruits (≥3 portions/day)                | 17.4         | 21.8          | 27.0            | 0.010                        | 0.07 (small)             | 8.6          | 8.8           | 11.1            | NS                           | -                        |
| 5. Red meat (<1 portion/day)               | 98.5         | 98.4          | 100.0           | NS                           | -                        | 96.3         | 96.5          | 100.0           | NS                           | -                        |
| 6. Butter or cream (<1 portion/day)        | 82.4         | 81.7          | 84.8            | NS                           | -                        | 71.8         | 76.5          | 55.6            | NS                           | -                        |
| 7. Sweet drinks (<1 drink/day)             | 77.5         | 79.1          | 75.8            | NS                           | -                        | 76.4         | 86.6          | 64.7            | 0.024                        | 0.09 (small)             |
| 8. Wine (7 to 14 glasses/week)             | 4.1          | 2.5           | 1.0             | NS                           | -                        | 9.2          | 7.1           | 5.6             | NS                           | -                        |
| 9. Legumes (≥3 portions/week)              | 16.5         | 20.6          | 25.0            | 0.020                        | 0.06 (small)             | 10.1         | 13.2          | 16.7            | NS                           | -                        |
| 10. Fish/seafood (≥3 portions/week)        | 14.6         | 14.4          | 17.0            | NS                           | -                        | 2.4          | 2.7           | 0.0             | NS                           | -                        |
| 11. Desserts (<3 portions/week)            | 76.8         | 73.5          | 82.8            | NS                           | -                        | 68.9         | 63.2          | 83.3            | NS                           | -                        |
| 12. Nuts (≥3 portions/week)                | 26.3         | 33.4          | 30.0            | 0.011                        | 0.07 (small)             | 13.9         | 23.5          | 22.2            | 0.021                        | 0.09 (small)             |
| 13. White meat preference (yes)            | 76.4         | 82.7          | 72.0            | 0.008                        | 0.07 (small)             | 53.1         | 59.6          | 50.0            | NS                           | -                        |
| 14. 'Sofrito' <sup>4</sup> (≥2 meals/week) | 60.6         | 63.0          | 56.0            | NS                           | -                        | 55.5         | 62.3          | 72.2            | NS                           | -                        |

<sup>1</sup>Comparison across disease status: Chi-Square *p*-value; <sup>2</sup>Strength of association or effect size by Phi and Cramer's *V* association coefficients (small 0.1, median 0.3, large 0.5); <sup>3</sup>tbsp: table spoon; <sup>4</sup>'Sofrito': mixture of tomato, onion and (or) garlic fried in olive oil use for cooking meals; NS: Not significant. SP: Spain; PT: Portugal; IT: Italy; GR: Greece; CY: Cyprus; BG: Bulgaria; NMK: Republic of North Macedonia.
