# Supplementary material for: Persistent Moderate-to-Weak Mediterranean Diet Adherence and Low Scoring for Plant-Based Foods across Several Southern European Countries: Are We Overlooking the Mediterranean Diet Recommendations?
Source: MDPI journal article supplement (doi:10.3390/nu13051432), 2021-04-23
Supplement: s1 [file s1]

**Supplementary Table S1.-** Summary of reported diseases per country as classified by the International Statistical Classification of Diseases and Related Health Problems (ICD, WHO). SP: Spain; IT: Italy; PT: Portugal; GR: Greece; CY: Cyprus; BG: Bulgaria; NMK: Republic of North Macedonia; MED: all Mediterranean countries together; Non-Med: all non-Mediterranean countries together.

| ICD                                                                | SP                    | IT         | PT         | GR        | CY         | MED         | BG         | NMK        | Non-MED    |
|--------------------------------------------------------------------|-----------------------|------------|------------|-----------|------------|-------------|------------|------------|------------|
| 1. Certain infectious or parasitic diseases                        | 1 (0.5%) <sup>1</sup> | 1 (1.1%)   | 1 (0.8%)   | 1 (1.2)   | -          | 4 (0.6%)    | -          | 1 (1.5%)   | 1 (0.8%)   |
| 2. Neoplasms                                                       | 15 (7.6%)             | 5 (5.3%)   | 2 (1.6%)   | 3 (3.5)   | 2 (1.5%)   | 27 (4.2%)   | 3 (4.4%)   | 9 (13.6%)  | 12 (9.0%)  |
| 3. Diseases of the blood or blood-forming organs                   | 2 (1.0%)              | 2 (2.1%)   | 2 (1.6%)   | 1 (1.2)   | 2 (1.5%)   | 9 (1.4%)    | 2 (3.0%)   | 2 (3.4%)   | 4 (3.0%)   |
| 4. Diseases of the immune system                                   | 10 (5.1%)             | 7 (7.4%)   | 8 (6.5%)   | 2 (2.3)   | -          | 27 (4.2%)   | 1 (1.5%)   | 2 (3.4%)   | 3 (2.2%)   |
| 5. Endocrine, nutritional or metabolic diseases                    | 61 (31%)              | 22 (23.4%) | 22 (17.9%) | 37 (43.1) | 43 (31.6%) | 185 (29.1%) | 25 (37.3%) | 22 (33.4%) | 47 (35.4%) |
| 6. Mental, behavioural or neurodevelopmental disorders             | 5 (2.5%)              | 4 (4.3%)   | 13 (10.7%) | 3 (3.5)   | 2 (1.5%)   | 27 (4.2%)   | 2 (3.0%)   | 1 (1.5%)   | 3 (2.2%)   |
| 7. Sleep-wake disorders                                            | 4 (2.0%)              | -          | -          | -         | -          | 4 (0.6%)    | 1 (1.5%)   |            | 1 (0.8%)   |
| 8. Diseases of the nervous system                                  | 4 (2.0%)              | 1 (1.1%)   | 7 (5.7%)   | 4 (4.6)   | 5 (3.7%)   | 21 (3.3%)   | 1 (1.5%)   | 2 (3.4%)   | 3 (2.2%)   |
| 9. Diseases of the visual system                                   | 4 (2.0%)              | -          | 1 (0.8%)   | -         | -          | 5 (0.8%)    | -          | 2 (3.4%)   | 2 (1.5%)   |
| 10. Diseases of the ear or mastoid process                         | -                     | -          | 1 (0.8%)   | -         | -          | 1 (0.2%)    | -          | -          | -          |
| 11. Diseases of the circulatory system                             | 34 (17.1%)            | 27 (28.7%) | 21 (17.1%) | 3 (3.5)   | 21 (15.4%) | 106 (16.7%) | 11 (16.4%) | 15 (22.8%) | 26 (19.5%) |
| 12. Diseases of the respiratory system                             | 12 (6.1%)             | 2 (2.1 %)  | 22 (17.9%) | 10 (11.6) | 1 (0.7%)   | 47 (7.4%)   | 1 (1.5%)   | 3 (3.4%)   | 4 (3.0%)   |
| 13. Diseases of the digestive system                               | 13 (6.6%)             | 11 (11.7%) | 14 (11.4%) | 7 (8.1)   | 12 (8.8%)  | 57 (8.9%)   | 12 (18.0%) | 3 (3.4%)   | 15 (11.3%) |
| 14. Diseases of the skin                                           | 5 (2.5%)              | -          | -          | 2 (2.3)   | 4 (2.9%)   | 11 (1.7%)   | 1 (1.5%)   | -          | 1 (0.8%)   |
| 15. Diseases of the musculoskeletal system or connective tissue    | 18 (9.1%)             | 5 (5.3%)   | 1 (0.8%)   | 9 (10.5)  | 39 (28.7%) | 72 (11.4%)  | 5 (7.4%)   | 2 (3.4%)   | 7 (5.3%)   |
| 16. Diseases of the genitourinary system                           | 4 (2.0%)              | 6 (6.4%)   | 2 (1.6%)   | 4 (4.6)   | 1 (0.7%)   | 17 (2.7%)   | 1 (1.5%)   | 2 (3.4%)   | 3 (2.2%)   |
| 17. Conditions related to sexual health                            | -                     | -          | -          | -         | -          | -           | -          | -          | -          |
| 18. Pregnancy, childbirth or puerperium                            | -                     | -          | 1 (0.8%)   | -         | 1 (0.7%)   | 2 (0.3%)    | -          | -          | -          |
| 19. Certain conditions originating in the perinatal period         | -                     | -          | -          | -         | -          | -           | -          | -          | -          |
| 20. Developmental anomalies                                        | -                     | -          | -          | -         | -          | -           | -          | -          | -          |
| 21. Symptoms, signs or clinical findings, not elsewhere classified | 6 (3.0%)              | 1 (1.1%)   | 5 (4.1%)   | -         | 3 (2.2%)   | 15 (2.3%)   | 1 (1.5%)   | -          | 1 (0.8%)   |
| Total reported                                                     | 198                   | 94         | 123        | 86        | 136        | 637         | 67         | 66         | 133        |

<sup>1</sup>: Results are shown as number of cases reported (% of total).
