# Supplementary material for: Persistent Moderate-to-Weak Mediterranean Diet Adherence and Low Scoring for Plant-Based Foods across Several Southern European Countries: Are We Overlooking the Mediterranean Diet Recommendations?
Source: MDPI journal article supplement (doi:10.3390/nu13051432), 2021-04-23
Supplement: s1 [file s1]

**Supplementary Table S4.** Food choices differences across age ranges in the sample population from the MED and the non-MED group of countries: % of participants scoring 1 (within Mediterranean diet recommendations) for each question of the 14-MEDAS. MED: all Mediterranean countries together (SP, PT, IT, GR, CY); Non-MED: all non-Mediterranean countries together (BG and NMK).

| 14-MEDAS Question (Score 1)                | MED     |         |         |        |                              |                          | Non-MED |         |         |        |                              |                          |
|--------------------------------------------|---------|---------|---------|--------|------------------------------|--------------------------|---------|---------|---------|--------|------------------------------|--------------------------|
|                                            | 18-24 y | 25-44 y | 45-64 y | ≥ 65 y | <i>p</i> -value <sup>1</sup> | Effect size <sup>2</sup> | 18-24 y | 25-44 y | 45-64 y | ≥ 65 y | <i>p</i> -value <sup>1</sup> | Effect size <sup>2</sup> |
| 1. Olive oil as main culinary fat (yes)    | 90.7    | 94.4    | 96.8    | 98.2   | <0.001                       | 0.09 (small)             | 26.8    | 43.9    | 41.3    | 28.6   | <0.001                       | 0.15 (small)             |
| 2. Olive oil (≥4 tbsp <sup>3</sup> /day)   | 11.1    | 17.9    | 19.8    | 15.8   | 0.004                        | 0.08 (small)             | 2.9     | 9.5     | 5.3     | 0.0    | 0.006                        | 0.12 (small)             |
| 3. Vegetables (≥2 portions/day)            | 45.2    | 53.4    | 51.3    | 58.6   | 0.03                         | 0.06 (small)             | 21.0    | 30.5    | 52.2    | 21.4   | <0.001                       | 0.25 (small)             |
| 4. Fruits (≥3 portions/day)                | 10.9    | 16.2    | 25.4    | 34.5   | <0.001                       | 0.15 (small)             | 6.5     | 8.8     | 10.9    | 7.1    | NS                           | -                        |
| 5. Red meat (<1 portion/day)               | 96.8    | 98.6    | 99.0    | 98.2   | 0.046                        | 0.06 (small)             | 95.9    | 96.2    | 97.4    | 96.4   | NS                           | -                        |
| 6. Butter or cream (<1 portion/day)        | 81.2    | 81.5    | 83.8    | 87.7   | NS                           | -                        | 73.3    | 70.9    | 71.3    | 74.1   | NS                           | -                        |
| 7. Sweet drinks (<1 drink/day)             | 68.4    | 76.7    | 84.1    | 83.9   | <0.001                       | 0.13 (small)             | 61.3    | 79.4    | 89.5    | 88.9   | <0.001                       | 0.25 (small)             |
| 8. Wine (7 to 14 glasses/week)             | 2.4     | 2.2     | 5.9     | 10.5   | <0.001                       | 0.11 (small)             | 2.5     | 8.0     | 15.7    | 10.7   | <0.001                       | 0.17 (small)             |
| 9. Legumes (≥3 portions/week)              | 15.9    | 15.4    | 22.0    | 22.4   | 0.002                        | 0.08 (small)             | 11.5    | 11.6    | 7.8     | 7.1    | NS                           | -                        |
| 10. Fish/seafood (≥3 portions/week)        | 15.1    | 11.9    | 18.9    | 15.5   | 0.001                        | 0.09 (small)             | 1.7     | 2.5     | 3.5     | 0.0    | NS                           | -                        |
| 11. Desserts (<3 portions/week)            | 71.6    | 75.1    | 79.5    | 94.7   | <0.001                       | 0.10 (small)             | 51.7    | 69.3    | 83.0    | 92.9   | <0.001                       | 0.26 (small)             |
| 12. Nuts (≥3 portions/week)                | 15.1    | 28.7    | 32.5    | 35.1   | <0.001                       | 0.14 (small)             | 13.2    | 17.4    | 15.2    | 3.6    | NS                           | -                        |
| 13. White meat preference (yes)            | 77.3    | 76.3    | 79.2    | 73.2   | NS                           | -                        | 58.6    | 57.4    | 44.8    | 35.7   | 0.001                        | 0.13 (small)             |
| 14. 'Sofrito' <sup>4</sup> (≥2 meals/week) | 61.2    | 55.4    | 68.8    | 70.7   | <0.001                       | 0.13 (small)             | 48.1    | 60.2    | 60.4    | 50.0   | 0.012                        | 0.11 (small)             |

<sup>1</sup> Comparison between age ranges: Chi-Square *p*-value; <sup>2</sup> Strength of association or effect size by Phi and Cramer's *V* association coefficients (small 0.1, median 0.3, large 0.5); <sup>3</sup> tbsp: table spoon; <sup>4</sup> 'Sofrito': mixture of tomato, onion and (or) garlic fried in olive oil use for cooking meals; NS: Not significant. SP: Spain; PT: Portugal; IT: Italy; GR: Greece; CY: Cyprus; BG: Bulgaria; NMK: Republic of North Macedonia.
