# Supplementary material for: Persistent Moderate-to-Weak Mediterranean Diet Adherence and Low Scoring for Plant-Based Foods across Several Southern European Countries: Are We Overlooking the Mediterranean Diet Recommendations?
Source: MDPI journal article supplement (doi:10.3390/nu13051432), 2021-04-23
Supplement: s1 [file s1]

**Supplementary Table S5.** Food choices differences across BMI ranges (kg/m<sup>2</sup>) in the sample population from the MED and the non-MED group of countries: % of participants scoring 1 (within Mediterranean diet recommendations) for each question of the 14-MEDAS. MED: all Mediterranean countries together (SP, PT, IT, GR, CY); Non-MED: all non-Mediterranean countries together (BG and NMK).

| 14-MEDAS Question (Score 1)                | MED    |             |             |      |                              |                          | Non-MED |             |             |      |                              |                          |
|--------------------------------------------|--------|-------------|-------------|------|------------------------------|--------------------------|---------|-------------|-------------|------|------------------------------|--------------------------|
|                                            | < 18.5 | 18.5 - 24.9 | 25.0 - 29.9 | ≥ 30 | <i>p</i> -value <sup>1</sup> | Effect size <sup>2</sup> | < 18.5  | 18.5 - 24.9 | 25.0 - 29.9 | ≥ 30 | <i>p</i> -value <sup>1</sup> | Effect size <sup>2</sup> |
| 1. Olive oil as main culinary fat (yes)    | 92.3   | 94.7        | 96.4        | 91.3 | 0.021                        | 0.07 (small)             | 45.5    | 37.0        | 41.3        | 33.9 | NS                           | -                        |
| 2. Olive oil (≥4 tbsp <sup>3</sup> /day)   | 17.9   | 16.9        | 18.6        | 17.7 | NS                           | -                        | 14.6    | 7.0         | 4.2         | 5.8  | NS                           | -                        |
| 3. Vegetables (≥2 portions/day)            | 44.9   | 54.3        | 49.1        | 45.9 | 0.020                        | 0.07 (small)             | 25.0    | 31.7        | 36.2        | 37.6 | NS                           | -                        |
| 4. Fruits (≥3 portions/day)                | 12.8   | 19.0        | 19.4        | 16.9 | NS                           | -                        | 4.5     | 9.5         | 8.7         | 7.3  | NS                           | -                        |
| 5. Red meat (<1 portion/day)               | 98.7   | 98.4        | 98.8        | 98.4 | NS                           | -                        | 97.7    | 98.0        | 96.1        | 91.0 | 0.003                        | 0.12 (small)             |
| 6. Butter or cream (<1 portion/day)        | 84.4   | 83.6        | 81.3        | 78.4 | NS                           | -                        | 65.9    | 70.8        | 77.6        | 66.1 | NS                           | -                        |
| 7. Sweet drinks (<1 drink/day)             | 72.7   | 78.5        | 80.3        | 70.9 | 0.014                        | 0.07 (small)             | 59.1    | 77.4        | 80.1        | 81.1 | 0.016                        | 0.11 (small)             |
| 8. Wine (7 to 14 glasses/week)             | 3.9    | 3.2         | 5.1         | 2.0  | NS                           | -                        | 4.5     | 9.1         | 7.1         | 11.2 | NS                           | -                        |
| 9. Legumes (≥3 portions/week)              | 14.1   | 18.0        | 18.0        | 17.7 | NS                           | -                        | 11.4    | 10.8        | 11.0        | 9.0  | NS                           | -                        |
| 10. Fish/seafood (≥3 portions/week)        | 14.1   | 15.4        | 12.3        | 16.5 | NS                           | -                        | 4.5     | 2.0         | 2.6         | 2.8  | NS                           | -                        |
| 11. Desserts (<3 portions/week)            | 72.7   | 77.8        | 74.3        | 76.9 | NS                           | -                        | 70.5    | 68.9        | 67.4        | 72.1 | NS                           | -                        |
| 12. Nuts (≥3 portions/week)                | 22.1   | 27.9        | 28.8        | 26.3 | NS                           | -                        | 11.4    | 14.9        | 16.7        | 14.4 | NS                           | -                        |
| 13. White meat preference (yes)            | 80.5   | 80.3        | 73.6        | 70.4 | <0.001                       | 0.09 (small)             | 54.5    | 56.6        | 51.9        | 43.8 | NS                           | -                        |
| 14. 'Sofrito' <sup>4</sup> (≥2 meals/week) | 68.8   | 60.8        | 63.5        | 54.1 | 0.035                        | 0.06 (small)             | 47.7    | 58.3        | 55.9        | 57.1 | NS                           | -                        |

<sup>1</sup> Comparison between body mass index (BMI) ranges: Chi-Square *p*-value; <sup>2</sup> Strength of association or effect size by Phi and Cramer's *V* association coefficients (small 0.1, median 0.3, large 0.5); <sup>3</sup> tbsp: table spoon; <sup>4</sup> 'Sofrito': mixture of tomato, onion and (or) garlic fried in olive oil use for cooking meals; NS: Not significant. SP: Spain; PT: Portugal; IT: Italy; GR: Greece; CY: Cyprus; BG: Bulgaria; NMK: Republic of North Macedonia.
