# Supplementary material for: Persistent Moderate-to-Weak Mediterranean Diet Adherence and Low Scoring for Plant-Based Foods across Several Southern European Countries: Are We Overlooking the Mediterranean Diet Recommendations?
Source: MDPI journal article supplement (doi:10.3390/nu13051432), 2021-04-23
Supplement: s1 [file s1]

**Supplementary Table S2b.** 14-MEDAS scoring throughout the non-Mediterranean sample population: score values are presented as the median (IQR, interquartile range), the mean  $\pm$  SD and the distribution ( $N$  (%)) into low ( $\leq 5$ ), moderate (6 – 9) and high ( $\geq 10$ ) levels of MD adherence. BG: Bulgaria; NMK: Republic of North Macedonia; non-MED: all non-Mediterranean countries together.

| Country ( $N$ )               | Non-MED (783)   | BG (440)        | NMK (343)       | $p$ -value |
|-------------------------------|-----------------|-----------------|-----------------|------------|
| Median (IQR)                  | 5.00 (3.00)     | 6.00 (2.00)     | 5.00 (3.00)     |            |
| Mean $\pm$ SD                 | 5.58 $\pm$ 1.82 | 5.80 $\pm$ 1.80 | 5.30 $\pm$ 1.80 | <0.001*    |
| Low                           | 402 (51.3)      | 199 (45.2)      | 203 (59.2)      |            |
| Moderate                      | 363 (46.4)      | 230 (52.3)      | 133 (38.8)      | <0.001     |
| High                          | 18 (2.3)        | 11 (2.5)        | 7 (2.0)         |            |
| <i>Sex</i>                    |                 |                 |                 |            |
| Women                         | 6.00 (3.00)     | 6.00 (2.00)     | 5.00 (3.00)     |            |
|                               | 5.66 $\pm$ 1.85 | 5.9 $\pm$ 1.80  | 5.30 $\pm$ 1.90 | <0.001     |
| Low                           | 276 (48.8)      | 126 (41.6)      | 150 (57.0)      |            |
| Moderate                      | 277 (48.9)      | 169 (55.8)      | 108 (41.1)      | <0.001     |
| High                          | 13 (2.3)        | 8 (2.6)         | 5 (1.9)         |            |
| Men                           | 5.00 (2.00)     | 5.00 (1.00)     | 5.00 (2.00)     |            |
|                               | 5.37 $\pm$ 1.73 | 5.52 $\pm$ 1.70 | 5.11 $\pm$ 1.75 | 0.058      |
| Low                           | 126 (58.1)      | 73 (53.3)       | 53 (66.3)       |            |
| Moderate                      | 86 (39.6)       | 61 (44.5)       | 25 (31.3)       | 0.155      |
| High                          | 5 (2.3)         | 3 (2.2)         | 2 (2.5)         |            |
| $p$ -value (M-W)              | 0.034           | 0.017           | 0.281           |            |
| $p$ -value (Chi-S)            | 0.062           | 0.074           | 0.285           |            |
| <i>Age range</i>              |                 |                 |                 |            |
| 18–24 y                       | 5.00 (2.00)     | 5.00 (3.00)     | 5.00 (2.0)      |            |
|                               | 4.83 $\pm$ 1.78 | 5.18 $\pm$ 1.68 | 4.78 $\pm$ 1.88 | 0.359      |
| Low                           | 127 (70.2)      | 15 (68.2)       | 112 (70.4)      |            |
| Moderate                      | 52 (28.7)       | 7 (31.8)        | 45 (28.3)       | 0.829      |
| High                          | 2 (1.1)         | 0 (0.00)        | 2 (1.3)         |            |
| 25–44 y                       | 6.00 (2.75)     | 6.00 (2.00)     | 5.00 (3)        |            |
|                               | 5.72 $\pm$ 1.83 | 5.76 $\pm$ 1.83 | 5.64 $\pm$ 1.84 | 0.424      |
| Low                           | 166 (46.1)      | 99 (43.2)       | 67 (51.1)       |            |
| Moderate                      | 183 (50.8)      | 123 (53.7)      | 60 (45.8)       | 0.340      |
| High                          | 11 (3.1)        | 7 (3.1)         | 4 (3.1)         |            |
| 45–64 y                       | 6.00 (2.00)     | 6.00 (2.00)     | 6.00 (2.00)     |            |
|                               | 6.02 $\pm$ 1.72 | 6.02 $\pm$ 1.78 | 6.02 $\pm$ 1.65 | 0.984      |
| Low                           | 93 (42.9)       | 70 (41.9)       | 23 (46.0)       |            |
| Moderate                      | 119 (54.8)      | 93 (55.7)       | 26 (52.0)       | 0.873      |
| High                          | 5 (2.3)         | 4 (2.4)         | 1 (2.0)         |            |
| $\geq 65$ y                   | 5.00 (1.50)     | 5.00 (2.00)     | 6.00 (1.0)      |            |
|                               | 5.28 $\pm$ 1.13 | 5.18 $\pm$ 1.14 | 6.00 $\pm$ 1.0  | 0.222      |
| Low                           | 16 (64.0)       | 15 (68.2)       | 1 (33.34)       |            |
| Moderate                      | 9 (36.0)        | 7 (31.8)        | 2 (66.7)        | 0.238      |
| High                          | 0 (0.)          | 0 (0)           | 0 (0)           |            |
| $p$ -value (K-W)              | <0.001          | 0.021           | <0.001          |            |
| $p$ -value (Chi-S)            | <0.001          | 0.085           | 0.010           |            |
| $\rho$ ( $p$ -value)          | 0.19 (<0.001)   | 0.03 (0.526)    | 0.25 (<0.001)   |            |
| <i>BMI range</i>              |                 |                 |                 |            |
| < 18.5 Kg/m <sup>2</sup>      | 5.00 (2.00)     | 6.00 (4.00)     | 4.50 (3.00)     |            |
|                               | 5.32 $\pm$ 2.32 | 5.96 $\pm$ 2.20 | 4.50 $\pm$ 2.28 | 0.041      |
| Low                           | 23 (56.1)       | 11 (47.8)       | 12 (66.7)       |            |
| Moderate                      | 16 (39.0)       | 11 (47.8)       | 5 (27.8)        | 0.425      |
| High                          | 2 (4.9)         | 1 (4.4)         | 1 (5.6)         |            |
| 18.5 - 24.9 Kg/m <sup>2</sup> | 5.00 (3.00)     | 6.00 (2.00)     | 5.00 (2.00)     |            |
|                               | 5.60 $\pm$ 1.78 | 5.89 $\pm$ 1.66 | 5.27 $\pm$ 1.85 | <0.001     |
| Low                           | 226 (51.8)      | 100 (43.5)      | 126 (61.2)      |            |
| Moderate                      | 199 (45.6)      | 124 (53.9)      | 75 (36.4)       | 0.001      |

|                               |             |                            |                            |                            |        |
|-------------------------------|-------------|----------------------------|----------------------------|----------------------------|--------|
|                               | <i>High</i> | 11 (2.5)                   | 6 (2.6)                    | 5 (2.4)                    |        |
| 25.0 - 29.9 Kg/m <sup>2</sup> |             | 5.00 (2.00)<br>5.69 ± 1.78 | 6.00 (2.00)<br>5.76 ± 1.91 | 5.00 (2.00)<br>5.60 ± 1.61 | 0.568  |
| <i>Low</i>                    |             | 101 (51.3)                 | 54 (49.1)                  | 47 (54.0)                  |        |
| <i>Moderate</i>               |             | 93 (47.2)                  | 53 (48.2)                  | 40 (46.0)                  | 0.265  |
| <i>High</i>                   |             | 3 (1.5)                    | 3 (2.7)                    | 0 (0)                      |        |
| ≥ 30 Kg/m <sup>2</sup>        |             | 6.00 (3.00)<br>5.49 ± 1.81 | 6.00 (3.00)<br>5.53 ± 1.75 | 5.00 (4.00)<br>5.33 ± 2.08 | 0.466  |
| <i>Low</i>                    |             | 46 (46.9)                  | 34 (44.2)                  | 12 (57.1)                  |        |
| <i>Moderate</i>               |             | 50 (51.0)                  | 42 (54.5)                  | 8 (38.1)                   | 0.296  |
| <i>High</i>                   |             | 2 (2.0)                    | 1 (1.3)                    | 1 (4.8)                    |        |
| <i>p</i> -value (K-W)         |             | 0.450                      | 0.680                      | 0.065                      |        |
| <i>p</i> -value (Chi-S)       |             | 0.760                      | 0.920                      | 0.381                      |        |
| $\rho$ ( <i>p</i> -value)     |             | -0.01 (0.876)              | -0.07 (0.172)              | 0.10 (0.078)               |        |
| <i>Disease status</i>         |             |                            |                            |                            |        |
| No pathology                  |             | 5.00 (3.00)<br>5.54 ± 1.80 | 6.00 (2.00)<br>5.75 ± 1.73 | 5.00 (2.00)<br>5.26 ± 1.86 | <0.001 |
| <i>Low</i>                    |             | 341 (52.7)                 | 169 (46.5)                 | 172 (60.6)                 |        |
| <i>Moderate</i>               |             | 292 (45.1)                 | 187 (51.5)                 | 105 (37.0)                 | 0.001  |
| <i>High</i>                   |             | 14 (2.2)                   | 7 (2.0)                    | 7 (2.5)                    |        |
| One pathology                 |             | 6.00 (2.00)<br>5.95 ± 1.90 | 6.00 (3.00)<br>6.19 ± 1.93 | 6.00 (3.00)<br>5.67 ± 1.85 | 0.236  |
| <i>Low</i>                    |             | 42 (42.5)                  | 20 (37.0)                  | 22 (48.9)                  |        |
| <i>Moderate</i>               |             | 54 (54.5)                  | 31 (57.4)                  | 23 (51.1)                  | 0.175  |
| <i>High</i>                   |             | 3 (3.0)                    | 3 (5.6)                    | 0.0 (0.0)                  |        |
| Multi-pathology               |             | 6.00 (2.75)<br>5.81 ± 2.31 | 6.00 (5.00)<br>6.00 ± 2.74 | 5.50 (2.50)<br>5.50 ± 1.51 | 0.826  |
| <i>Low</i>                    |             | 7 (43.8)                   | 4 (40.0)                   | 3 (50.0)                   |        |
| <i>Moderate</i>               |             | 8 (50.0)                   | 5 (50.0)                   | 3 (50.0)                   | 0.710  |
| <i>High</i>                   |             | 1 (6.3)                    | 1 (10.0)                   | 0.0 (0.0)                  |        |
| <i>p</i> -value (K-W)         |             | 0.117                      | 0.354                      | 0.271                      |        |
| <i>p</i> -value (Chi-S)       |             | 0.292                      | 0.205                      | 0.353                      |        |

N: sample population size. The Mann–Whitney test (M-W) was used to assess the differences in the 14-MEDAS score between sexes. The Kruskal-Wallis (K-W) test was applied for comparisons of the 14-MEDAS score across age ranges, BMI categories and disease status subgroups. Chi-Square tests (Chi-S) were used to assess differences between nominal and ordinal variables. Correlation between variables was calculated using the Spearman coefficient ( $\rho$ ) adjusted in each case for the corresponding confounding variables (sex, age, BMI, disease).; \*: *p*-value across countries adjusted for sex, age, BMI and disease (General Linear Model); differences were considered significant when *p*-values < 0.05.
