# Supplementary material for: Persistent Moderate-to-Weak Mediterranean Diet Adherence and Low Scoring for Plant-Based Foods across Several Southern European Countries: Are We Overlooking the Mediterranean Diet Recommendations?
Source: MDPI journal article supplement (doi:10.3390/nu13051432), 2021-04-23
Supplement: s1 [file s1]

**Supplementary Table S2a.** 14-MEDAS scoring throughout the MED sample population: score values are presented as the median (IQR, interquartile range), the mean  $\pm$  SD and the distribution (*N* (%)) into low ( $\leq 5$ ), moderate (6 – 9) and high ( $\geq 10$ ) levels of MD adherence. SP: Spain; IT: Italy; PT: Portugal; GR: Greece; CY: Cyprus; MED: All Mediterranean countries together.

| Country ( <i>N</i> )          | MED (2163)      | SP (467)        | IT (503)        | PT (488)        | GR (288)        | CY (417)        | <i>p</i> -value |
|-------------------------------|-----------------|-----------------|-----------------|-----------------|-----------------|-----------------|-----------------|
| Median (IQR)                  | 7.00 (2.00)     | 8.00 (2.00)     | 7.00 (2.00)     | 7.00 (3.00)     | 7.00 (3.00)     | 6.00 (2.00)     |                 |
| Mean $\pm$ SD                 | 7.08 $\pm$ 1.96 | 7.90 $\pm$ 1.72 | 6.80 $\pm$ 1.54 | 7.38 $\pm$ 2.10 | 7.13 $\pm$ 2.03 | 6.12 $\pm$ 1.99 | <0.001*         |
| Low                           | 448 (20.7)      | 33 (7.1)        | 99 (19.7)       | 97 (19.9)       | 65 (22.6)       | 154 (36.9)      |                 |
| Moderate                      | 1477 (68.3)     | 355 (76.0)      | 384 (76.3)      | 306 (62.7)      | 189 (65.6)      | 243 (58.3)      | <0.001          |
| High                          | 238 (11.0)      | 79 (16.9)       | 20 (4.0)        | 85 (17.4)       | 34 (11.8)       | 20 (4.8)        |                 |
| <i>Sex</i>                    |                 |                 |                 |                 |                 |                 |                 |
| Women                         | 7.00 (3.00)     | 8.00 (2.00)     | 7.00 (2.00)     | 8.00 (3.00)     | 7.00 (3.00)     | 6.00 (2.00)     |                 |
|                               | 7.22 $\pm$ 1.92 | 8.05 $\pm$ 1.65 | 6.89 $\pm$ 1.59 | 7.71 $\pm$ 1.96 | 7.23 $\pm$ 2.05 | 6.22 $\pm$ 1.82 | <0.001          |
| Low                           | 274 (19.0)      | 15 (5.6)        | 59 (18.8)       | 50 (14.3)       | 52 (23.3)       | 97 (32.9)       |                 |
| Moderate                      | 995 (68.8)      | 202 (75.9)      | 240 (76.6)      | 229 (65.6)      | 141 (63.2)      | 184 (62.4)      | <0.001          |
| High                          | 177 (12.2)      | 49 (18.4)       | 14 (4.6)        | 70 (20.1)       | 30 (13.5)       | 14 (4.7)        |                 |
| Men                           | 7.00 (2.00)     | 8.00 (3.00)     | 7.00 (2)        | 7.00 (3.00)     | 7.00 (2.00)     | 6.00 (4.00)     |                 |
|                               | 6.81 $\pm$ 2.01 | 7.71 $\pm$ 1.80 | 6.64 $\pm$ 1.43 | 6.58 $\pm$ 2.25 | 6.77 $\pm$ 1.92 | 5.88 $\pm$ 2.31 | <0.001          |
| Low                           | 172 (24.1)      | 18 (9.0)        | 40 (21.0)       | 46 (33.8)       | 13 (20.0)       | 56 (46.7)       |                 |
| Moderate                      | 479 (67.3)      | 153 (76.1)      | 144 (75.8)      | 75 (55.1)       | 48 (73.8)       | 58 (48.3)       | <0.001          |
| High                          | 61 (8.6)        | 30 (14.9)       | 6 (3.2)         | 15 (11.0)       | 4 (6.2)         | 6 (5.0)         |                 |
| <i>p</i> -value (M-W)         | <0.001          | 0.029           | 0.067           | <0.001          | 0.104           | 0.076           |                 |
| <i>p</i> -value (Chi-S)       | 0.002           | 0.271           | 0.664           | <0.001          | 0.184           | 0.026           |                 |
| <i>Age range</i>              |                 |                 |                 |                 |                 |                 |                 |
| 18–24 y                       | 7.00 (3.00)     | 8.00 (3.00)     | 6.00 (2.00)     | 7.00 (3.00)     | 7.00 (4.00)     | 6.00 (2.00)     |                 |
|                               | 6.53 $\pm$ 1.88 | 7.43 $\pm$ 1.86 | 6.26 $\pm$ 1.52 | 6.71 $\pm$ 2.09 | 6.48 $\pm$ 2.1  | 6.04 $\pm$ 1.78 | 0.001           |
| Low                           | 106 (28.9)      | 8 (18.2)        | 34 (28.8)       | 37 (29.8)       | 8 (32.0)        | 18 (32.7)       |                 |
| Moderate                      | 238 (64.8)      | 31 (70.5)       | 81 (68.6)       | 76 (61.3)       | 15 (60.0)       | 35 (63.6)       | 0.305           |
| High                          | 23 (6.3)        | 5 (11.4)        | 3 (2.6)         | 11 (8.9)        | 2 (8.0)         | 2 (3.6)         |                 |
| 25–44 y                       | 7.00 (2.00)     | 7.50 (2.0)      | 7.0 (2.0)       | 8.00 (3.00)     | 7.00 (3.00)     | 6.00 (2.00)     |                 |
|                               | 6.91 $\pm$ 1.92 | 7.58 $\pm$ 1.49 | 6.75 $\pm$ 1.49 | 7.50 $\pm$ 2.03 | 7.08 $\pm$ 1.97 | 6.00 $\pm$ 1.94 | <0.001          |
| Low                           | 240 (23.0)      | 11 (7.9)        | 44 (20.5)       | 38 (17.7)       | 51 (22.8)       | 97 (38.6)       |                 |
| Moderate                      | 712 (68.2)      | 114 (81.4)      | 164 (76.3)      | 138 (64.2)      | 151 (67.4)      | 145 (57.8)      | <0.001          |
| High                          | 92 (8.8)        | 15 (10.7)       | 7 (3.2)         | 39 (18.1)       | 22 (9.8)        | 9 (3.6)         |                 |
| 45–64 y                       | 7.00 (3.00)     | 8.00 (2.00)     | 7.00 (2.00)     | 8.00 (3.50)     | 8.00 (4.00)     | 6.00 (3.00)     |                 |
|                               | 7.56 $\pm$ 1.96 | 8.10 $\pm$ 1.78 | 7.13 $\pm$ 1.45 | 7.76 $\pm$ 2.16 | 7.91 $\pm$ 2.21 | 6.34 $\pm$ 2.10 | <0.001          |
| Low                           | 98 (14.1)       | 14 (5.2)        | 20 (13.4)       | 22 (15.6)       | 5 (14.3)        | 37 (37.0)       |                 |
| Moderate                      | 481 (69.3)      | 198 (73.6)      | 124 (83.2)      | 84 (59.6)       | 20 (57.1)       | 55 (55.0)       | <0.001          |
| High                          | 115 (16.6)      | 57 (21.3)       | 5 (3.5)         | 35 (24.8)       | 10 (28.6)       | 8 (8.0)         |                 |
| $\geq 65$ y                   | 8.00 (2.00)     | 9.00 (1.00)     | 8.00 (4.0)      | 8.00 (2.50)     | 7.00            | 7.00 (3.00)     |                 |
|                               | 7.89 $\pm$ 1.82 | 8.69 $\pm$ 1.49 | 7.86 $\pm$ 1.68 | 7.88 $\pm$ 1.25 | 7.00            | 7.09 $\pm$ 2.59 | 0.543           |
| Low                           | 3 (5.5)         | 0 (0.0)         | 1 (4.8)         | 0 (0.00)        | 0 (0)           | 2 (18.2)        |                 |
| Moderate                      | 44 (81.5)       | 12 (92.3)       | 15 (71.4)       | 8 (100.0)       | 1 (100)         | 8 (72.7)        | 0.359           |
| High                          | 7 (13.0)        | 1 (7.7)         | 5 (23.8)        | 0 (0.0)         | 0 (0)           | 1 (9.1)         |                 |
| <i>p</i> -value (K-W)         | <0.001          | 0.010           | <0.001          | <0.001          | 0.074           | 0.218           |                 |
| <i>p</i> -value (Chi-S)       | <0.001          | <0.001          | <0.001          | 0.001           | 0.052           | 0.440           |                 |
| $\rho$ ( <i>p</i> -value)     | 0.21 (<0.001)   | 0.15 (0.002)    | 0.29 (<0.001)   | 0.18 (<0.001)   | 0.15 (0.016)    | 0.11 (0.025)    |                 |
| <i>BMI range</i>              |                 |                 |                 |                 |                 |                 |                 |
| < 18.5 Kg/m <sup>2</sup>      | 7.00 (3.00)     | 7.00 (2.8)      | 7.00 (2.25)     | 8.00 (1.50)     | 7.00 (4.00)     | 7.00 (3.00)     |                 |
|                               | 6.84 $\pm$ 1.85 | 6.89 $\pm$ 1.96 | 7.13 $\pm$ 1.88 | 7.77 $\pm$ 1.52 | 7.33 $\pm$ 2.39 | 6.44 $\pm$ 1.65 | 0.090           |
| Low                           | 20 (27.0)       | 2 (25.0)        | 3 (13.6)        | 2 (11.8)        | 2 (22.2)        | 6 (33.3)        |                 |
| Moderate                      | 48 (64.9)       | 5 (62.5)        | 17 (77.3)       | 13 (76.5)       | 5 (55.6)        | 12 (66.7)       | 0.472           |
| High                          | 6 (8.1)         | 1 (12.5)        | 2 (9.1)         | 2 (11.8)        | 2 (22.2)        | 0 (0.0)         |                 |
| 18.5 - 24.9 Kg/m <sup>2</sup> | 7.00 (3.00)     | 8.00 (2.00)     | 7.00 (2.00)     | 7.00 (3.00)     | 8.00 (3.00)     | 6.00 (3.00)     |                 |
|                               | 7.19 $\pm$ 1.97 | 8.06 $\pm$ 1.71 | 6.82 $\pm$ 1.43 | 7.42 $\pm$ 2.25 | 7.39 $\pm$ 2.04 | 6.27 $\pm$ 1.91 | <0.001          |
| Low                           | 237 (19.0)      | 15 (5.6)        | 52 (17.3)       | 65 (22.0)       | 27 (19.0)       | 75 (31.4)       |                 |
| Moderate                      | 854 (68.3)      | 201 (75.3)      | 239 (79.7)      | 167 (56.4)      | 95 (66.9)       | 152 (63.6)      | <0.001          |

|                               |                            |                            |                            |                            |                            |                            |        |
|-------------------------------|----------------------------|----------------------------|----------------------------|----------------------------|----------------------------|----------------------------|--------|
| <i>High</i>                   | 159 (12.7)                 | 51 (19.1)                  | 9 (3.0)                    | 64 (21.6)                  | 20 (14.1)                  | 12 (5.0)                   |        |
| 25.0 - 29.9 Kg/m <sup>2</sup> | 7.00 (2.00)<br>7.06 ± 1.97 | 8.00 (3.00)<br>7.73 ± 1.80 | 7.00 (3.00)<br>6.65 ± 1.58 | 7.00 (3.00)<br>7.36 ± 1.79 | 7.00 (3.00)<br>6.87 ± 2.06 | 6.00 (3.00)<br>6.04 ± 2.31 | <0.001 |
| <i>Low</i>                    | 119 (21.1)                 | 14 (9.8)                   | 35 (24.8)                  | 19 (17.4)                  | 22 (26.5)                  | 40 (42.1)                  |        |
| <i>Moderate</i>               | 390 (69.3)                 | 106 (74.1)                 | 101 (71.6)                 | 79 (72.5)                  | 54 (65.1)                  | 49 (51.6)                  | <0.001 |
| <i>High</i>                   | 54 (9.6)                   | 23 (16.1)                  | 5 (3.6)                    | 11 (10.1)                  | 7 (8.4)                    | 6 (6.3)                    |        |
| ≥ 30 Kg/m <sup>2</sup>        | 7.00 (3.00)<br>6.66 ± 1.91 | 8.00 (2.00)<br>7.82 ± 1.45 | 7.00 (2.00)<br>6.84 ± 1.80 | 7.00 (2.00)<br>7.14 ± 2.23 | 7.00 (3.00)<br>6.73 ± 1.73 | 5.00 (3.00)<br>5.59 ± 1.77 | <0.001 |
| <i>Low</i>                    | 69 (27.8)                  | 2 (4.5)                    | 8 (21.0)                   | 10 (19.2)                  | 13 (25.5)                  | 32 (50.8)                  |        |
| <i>Moderate</i>               | 162 (65.3)                 | 38 (86.4)                  | 27 (71.0)                  | 35 (67.3)                  | 34 (66.7)                  | 29 (46.0)                  | <0.001 |
| <i>High</i>                   | 17 (6.9)                   | 4 (9.1)                    | 3 (8.0)                    | 7 (13.5)                   | 4 (7.8)                    | 2 (3.2)                    |        |
| <i>p</i> -value (K-W)         | 0.001                      | 0.142                      | 0.045                      | 0.749                      | 0.073                      | 0.030                      |        |
| <i>p</i> -value (Chi-S)       | 0.005                      | 0.142                      | 0.135                      | 0.048                      | 0.580                      | 0.076                      |        |
| $\rho$ ( <i>p</i> -value)     | -0.11 (<0.001)             | -0.08 (0.089)              | -0.05 (0.257)              | -0.09 (0.051)              | -0.18 (0.003)              | -0.17 (0.001)              |        |
| <i>Disease status</i>         |                            |                            |                            |                            |                            |                            |        |
| No pathology                  | 7.00 (2.00)<br>7.02 ± 1.96 | 8.00 (2.00)<br>7.86 ± 1.79 | 7.00 (2.00)<br>6.79 ± 1.50 | 7.00 (3.00)<br>7.34 ± 2.15 | 7.00 (3.00)<br>7.04 ± 2.06 | 6.00 (2.00)<br>6.15 ± 1.99 | <0.001 |
| <i>Low</i>                    | 338 (21.2)                 | 26 (8.6)                   | 80 (19.0)                  | 71 (20.8)                  | 50 (23.1)                  | 111 (35.1)                 |        |
| <i>Moderate</i>               | 1090 (68.2)                | 223 (73.8)                 | 327 (77.5)                 | 208 (60.8)                 | 144 (66.7)                 | 188 (59.5)                 | <0.001 |
| <i>High</i>                   | 170 (10.6)                 | 53 (17.5)                  | 15 (3.5)                   | 63 (18.4)                  | 22 (10.2)                  | 17 (5.4)                   |        |
| One pathology                 | 7.00 (3.00)<br>7.27 ± 1.95 | 8.00 (2.00)<br>7.88 ± 1.61 | 7.00 (2.00)<br>6.83 ± 1.78 | 8.00 (3.00)<br>7.58 ± 1.91 | 7.00 (3.00)<br>7.47 ± 1.89 | 6.00 (4.00)<br>5.99 ± 2.14 | <0.001 |
| <i>Low</i>                    | 79 (18.5)                  | 5 (4.1)                    | 16 (22.8)                  | 17 (16.0)                  | 11 (17.7)                  | 31 (44.3)                  |        |
| <i>Moderate</i>               | 298 (69.6)                 | 99 (81.8)                  | 49 (70.0)                  | 73 (68.9)                  | 40 (64.6)                  | 37 (52.9)                  | <0.001 |
| <i>High</i>                   | 51 (11.9)                  | 17 (14.0)                  | 5 (7.2)                    | 16 (15.1)                  | 11 (17.7)                  | 2 (2.9)                    |        |
| Multi-pathology               | 7.00 (3.00)<br>7.29 ± 1.89 | 8.50 (2.00)<br>8.22 ± 1.41 | 7.00 (3.00)<br>6.91 ± 1.58 | 8.50 (2.50)<br>8.20 ± 2.30 | 7.00 (4.00)<br>7.22 ± 2.10 | 6.00 (2.00)<br>6.13 ± 1.59 | <0.001 |
| <i>Low</i>                    | 21 (21.4)                  | 1 (2.8)                    | 3 (27.3)                   | 1 (10.0)                   | 3 (33.3)                   | 12 (38.7)                  |        |
| <i>Moderate</i>               | 66 (67.3)                  | 29 (80.6)                  | 8 (72.7)                   | 6 (60.0)                   | 5 (55.6)                   | 18 (58.1)                  | 0.006  |
| <i>High</i>                   | 11 (11.2)                  | 6 (16.7)                   | 0 (0)                      | 3 (30.0)                   | 1 (11.1)                   | 1 (3.2)                    |        |
| <i>p</i> -value (K-W)         | 0.022                      | 0.390                      | 0.970                      | 0.205                      | 0.362                      | 0.856                      |        |
| <i>p</i> -value (Chi-S)       | 0.763                      | 0.296                      | 0.456                      | 0.466                      | 0.456                      | 0.610                      |        |

*N*: sample population size. The Mann–Whitney test (M-W) was used to assess the differences in the 14-MEDAS score between sexes. The Kruskal-Wallis (K-W) test was applied for comparisons of the 14-MEDAS score across age ranges, BMI categories and disease status subgroups. Chi-Square tests (Chi-S) were used to assess differences between nominal and ordinal variables. Correlation between variables was calculated using the Spearman coefficient ( $\rho$ ) adjusted in each case for the corresponding confounding variables (sex, age, BMI, disease). \*: *p*-value adjusted for sex, age, BMI and disease (General Linear Model); differences were considered significant when *p*-values < 0.05.
