# Supplementary material for: Persistent Moderate-to-Weak Mediterranean Diet Adherence and Low Scoring for Plant-Based Foods across Several Southern European Countries: Are We Overlooking the Mediterranean Diet Recommendations?
Source: MDPI journal article supplement (doi:10.3390/nu13051432), 2021-04-23
Supplement: s1 [file s1]

**Supplementary Table S3.** Food choices differences between women and men in the sample population from the MED and the non-MED group of countries: % of participants scoring 1 (within Mediterranean diet recommendations) for each question of the 14-MEDAS. MED: all Mediterranean countries together (SP, PT, IT, GR, CY); Non-MED: all non-Mediterranean countries together (BG and NMK).

| 14-MEDAS Question (Score 1)                | MED   |      |                              |                          | Non-MED |      |                              |                          |
|--------------------------------------------|-------|------|------------------------------|--------------------------|---------|------|------------------------------|--------------------------|
|                                            | Women | Men  | <i>p</i> -value <sup>1</sup> | Effect size <sup>2</sup> | Women   | Men  | <i>p</i> -value <sup>1</sup> | Effect size <sup>2</sup> |
| 1. Olive oil as main culinary fat (yes)    | 95.4  | 93.2 | 0.03                         | 0.05 (small)             | 38.7    | 36.3 | NS                           | -                        |
| 2. Olive oil (≥4 tbsp <sup>3</sup> /day)   | 18.4  | 15.5 | NS                           | -                        | 6.9     | 5.2  | NS                           | -                        |
| 3. Vegetables (≥2 portions/day)            | 57.3  | 39.6 | <0.001                       | 0.17 (small)             | 34.2    | 30.4 | NS                           | -                        |
| 4. Fruits (≥3 portions/day)                | 19.3  | 17.7 | NS                           | -                        | 8.5     | 8.9  | NS                           | -                        |
| 5. Red meat (<1 portion/day)               | 98.9  | 97.5 | 0.018                        | 0.05 (small)             | 98.3    | 91.8 | <0.001                       | 0.16 (small)             |
| 6. Butter or cream (<1 portion/day)        | 82.9  | 81.5 | NS                           | -                        | 70.5    | 75.1 | NS                           | -                        |
| 7. Sweet drinks (<1 drink/day)             | 80.1  | 73.4 | <0.001                       | 0.08 (small)             | 78.9    | 74.1 | NS                           | -                        |
| 8. Wine (7 to 14 glasses/week)             | 2.3   | 6.4  | <0.001                       | 0.10 (small)             | 8.5     | 8.9  | NS                           | -                        |
| 9. Legumes (≥3 portions/week)              | 15.6  | 22.4 | <0.001                       | 0.08 (small)             | 11.2    | 8.9  | NS                           | -                        |
| 10. Fish/seafood (≥3 portions/week)        | 15.9  | 12.6 | 0.04                         | 0.04 (small)             | 2.2     | 3.2  | NS                           | -                        |
| 11. Desserts (<3 portions/week)            | 76.3  | 76.8 | NS                           | -                        | 67.0    | 73.0 | NS                           | -                        |
| 12. Nuts (≥3 portions/week)                | 28.9  | 25.5 | NS                           | -                        | 16.0    | 13.3 | NS                           | -                        |
| 13. White meat preference (yes)            | 82.1  | 67.8 | <0.001                       | 0.16 (small)             | 56.9    | 45.7 | 0.002                        | 0.10 (small)             |
| 14. 'Sofrito' <sup>4</sup> (≥2 meals/week) | 59.5  | 64.4 | 0.03                         | 0.05 (small)             | 60.2    | 47.8 | 0.001                        | 0.11 (small)             |

<sup>1</sup> Comparison between sexes: Chi-Square *p*-value; <sup>2</sup> Strength of association or effect size by Phi and Cramer's *V* association coefficients (small 0.1, median 0.3, large 0.5); <sup>3</sup> tbsp: table spoon; <sup>4</sup> 'Sofrito': mixture of tomato, onion and (or) garlic fried in olive oil use for cooking meals; NS: Not significant. SP: Spain; PT: Portugal; IT: Italy; GR: Greece; CY: Cyprus; BG: Bulgaria; NMK: Republic of North Macedonia.
