# Supplementary material for: Persistent Moderate-to-Weak Mediterranean Diet Adherence and Low Scoring for Plant-Based Foods across Several Southern European Countries: Are We Overlooking the Mediterranean Diet Recommendations?
Source: Nutrients. 2021 Apr 23;13(5):1432. doi: 10.3390/nu13051432 (PMC8145023; doi:10.3390/nu13051432)
Supplement: Supplementary file 1 [file nutrients-13-01432-s001.zip]

Archive with 10 entries (10 files):
- Supplementary Figure S1.pptx
- Supplementary Figure S2.pptx
- Supplementary Figure S3.pptx
- Supplementary Table S1.pdf
- Supplementary Table S2a.- 14MEDAS_MEDcountries_final.pdf
- Supplementary Table S2b.- 14MEDAS_Non-MEDcountries_final.pdf
- Supplementary Table S3.- MED vs nonMED and SEX_final.pdf
- Supplementary Table S4.- MED vs nonMED and AGE range_final.pdf
- Supplementary Table S5.- MED vs nonMED and BMI range_final.pdf
- Supplementary Table S6.- MED vs nonMED and DISEASE_final.pdf
